# Supplementary material for: Hydroxyl Groups on Annular Ring-B Dictate the Affinities of Flavonol–CCL2 Chemokine Binding Interactions
Source: PubMed Central journal article supplement — ACS Omega. 2021 Apr 6;6(15):10306–17. doi: 10.1021/acsomega.1c00655 (PMC8153786; doi:10.1021/acsomega.1c00655), 2021-04-06

## **Supporting Information**

### **Hydroxyl Groups on Annular Ring-B Dictate the Affinities of Flavonol-CCL2 Chemokine Binding Interactions**

**Nidhi Joshi, Deepak Kumar Tripathi, Nupur Nagar and Krishna Mohan Poluri\***

**Department of Biotechnology, Indian Institute of Technology Roorkee,**

**Roorkee – 247667, Uttarakhand, India**

**\*Corresponding Author:**

Dr. Krishna Mohan Poluri,

Department of Biotechnology,

Indian Institute of Technology Roorkee (IIT-Roorkee),

Roorkee – 247667, Uttarakhand, India

Tel: +91-1332-284779;

E-mail: [krishna.poluri@bt.iitr.ac.in](mailto:krishna.poluri@bt.iitr.ac.in) / [mohanpmk@gmail.com](mailto:mohanpmk@gmail.com)

**Table S1:** Summary of all the possible bonds of mCCL2/hCCL2-kampherol (KP) complexes as obtained from molecular docking. HPI and H-bond represent the hydrophobic interaction, and hydrogen bond respectively.

| mCCL2     | Kaempferol<br>(KP) | Type of<br>Interaction &<br>Distance | hCCL2     | Kaempferol<br>(KP) | Type of<br>Interaction &<br>Distance |
|-----------|--------------------|--------------------------------------|-----------|--------------------|--------------------------------------|
| C11 (O)   | O4H                | H-Bond (2.4 Å)                       | C11 (O)   | O4H                | H-Bond (2.9 Å)                       |
| Y13 (N)   | O2                 | H-Bond (3.1 Å)                       | Y13 (HH)  | O2                 | H-Bond (3.3 Å)                       |
| Y13 (NH)  | O2                 | H-Bond (2.4 Å)                       | Y13 (HH)  | O3H                | H-Bond (3.2 Å)                       |
| Y13 (NH)  | O3H                | H-Bond (3.2 Å)                       | N14 (Oδ1) | O3H                | H-Bond (2.1 Å)                       |
| Y13 (NH)  | O3                 | H-Bond (2.4 Å)                       | N14 (Oδ1) | O3                 | H-Bond (2.6 Å)                       |
| Y13 (NH)  | C3                 | HPI (3.0 Å)                          | N14 (Cβ)  | C6'                | HPI (3.9 Å)                          |
| S14 (Hγ)  | O3H                | H-Bond (2.8 Å)                       | T16 (Oγ1) | O6H                | H-Bond (2.2 Å)                       |
| S14 (Oγ)  | O3                 | H-Bond (3.0 Å)                       | T16 (Oγ1) | O6                 | H-Bond (3.1 Å)                       |
| S14 (N)   | O3                 | H-Bond (2.9 Å)                       | T16 (Hγ)  | O6H                | H-Bond (2.6 Å)                       |
| S14 (C)   | C5'                | HPI (3.5 Å)                          | T16 (N)   | O6H                | H-Bond (3.2 Å)                       |
| S14 (O)   | O3H                | H-Bond (3.0 Å)                       | T16 (N)   | C5'                | HPI (3.2 Å)                          |
| T16 (N)   | C4'                | HPI (3.5 Å)                          | T16 (Cα)  | C5'                | HPI (3.5 Å)                          |
| T16 (N)   | O6                 | H-Bond (3.2 Å)                       | E50 (O)   | O1                 | H-Bond (3.3 Å)                       |
| T16 (NH)  | O6                 | H-Bond (3.2 Å)                       | E50 (Oη1) | O5                 | H-Bond (2.8 Å)                       |
| T16 (N)   | C5'                | HPI (2.9 Å)                          | E50 (Oη1) | O5H                | H-Bond (2.2 Å)                       |
| E50 (Oη1) | O5H                | H-Bond (2.4 Å)                       | E50 (Cβ)  | C8                 | HPI (3.6 Å)                          |
| E50 (Cβ)  | C8                 | HPI (3.8 Å)                          | C52 (NH)  | O1                 | H-Bond (2.3 Å)                       |
| C52 (NH)  | O1                 | H-Bond (2.4 Å)                       | C52 (N)   | O1                 | H-Bond (3.0 Å)                       |
| C52 (N)   | O1                 | H-Bond (3.5 Å)                       | C52 (Cβ)  | C2                 | HPI (3.6 Å)                          |
| C52 (Cβ)  | C6'                | HPI (3.5 Å)                          | C52 (Cβ)  | C1'                | HPI (3.9 Å)                          |

**Table S2:** Summary of all the possible bonds of mCCL2/hCCL2-quercetin (QT) complexes as obtained from molecular docking. HPI and H-bond represent the hydrophobic interaction, and hydrogen bond respectively.

| mCCL2     | Quercetin<br>(QT) | Type of<br>Interaction &<br>Distance | hCCL2     | Quercetin<br>(QT) | Type of<br>Interaction &<br>Distance |
|-----------|-------------------|--------------------------------------|-----------|-------------------|--------------------------------------|
| C11 (O)   | O4H               | H-Bond (1.7 Å)                       | C11 (O)   | O4H               | H-Bond (2.2 Å)                       |
| C11 (NH)  | O4H               | H-Bond (3.5 Å)                       | Y13 (HH)  | O2                | H-Bond (3.2 Å)                       |
| Y13 (NH)  | O2                | H-Bond (2.9 Å)                       | Y13 (HH)  | O3H               | H-Bond (3.7 Å)                       |
| Y13 (NH)  | O3H               | H-Bond (1.7 Å)                       | N14 (Oδ1) | O3H               | H-Bond (2.1 Å)                       |
| Y13 (NH)  | O3                | H-Bond (2.2 Å)                       | N14 (Oδ1) | O3                | H-Bond (2.8 Å)                       |
| Y13 (NH)  | C3                | HPI (3.3 Å)                          | T16 (Oγ1) | O6H               | H-Bond (2.1 Å)                       |
| S14 (N)   | O3                | H-Bond (3.2 Å)                       | T16 (Oγ1) | O6                | H-Bond (3.1 Å)                       |
| S14 (NH)  | O3                | H-Bond (2.2 Å)                       | T16 (Hγ)  | O6H               | H-Bond (2.5 Å)                       |
| S14 (NH)  | O3H               | H-Bond (2.2 Å)                       | T16 (N)   | O6H               | H-Bond (3.5 Å)                       |
| S14 (Hγ)  | C6'               | HPI (3.8 Å)                          | T16 (N)   | C5'               | HPI (3.3 Å)                          |
| S14 (Oγ)  | O3                | H-Bond (3.5 Å)                       | T16 (Cα)  | C5'               | HPI (3.5 Å)                          |
| T16 (N)   | C4'               | HPI (3.5 Å)                          | T16 (Cβ)  | C4'               | HPI (3.7 Å)                          |
| T16 (N)   | O6                | H-Bond (3.1 Å)                       | E50 (O)   | O1                | H-Bond (3.2 Å)                       |
| T16 (NH)  | O6                | H-Bond (3.1 Å)                       | E50 (Oη1) | O5                | H-Bond (2.9 Å)                       |
| T16 (N)   | C5'               | HPI (3.2 Å)                          | E50 (Oη1) | O5H               | H-Bond (2.3 Å)                       |
| E50 (Oη1) | O5H               | H-Bond (2.1 Å)                       | E50 (Cβ)  | C8                | HPI (3.6 Å)                          |
| E50 (Cβ)  | C2                | HPI (3.6 Å)                          | I51 (CγH) | O7H               | H-Bond (3.4 Å)                       |
| V51 (CγH) | O7H               | H-Bond (2.8 Å)                       | C52 (NH)  | O1                | H-Bond (2.3 Å)                       |
| C52 (NH)  | O1                | H-Bond (2.6 Å)                       | C52 (N)   | O1                | H-Bond (3.1 Å)                       |
| C52 (Cβ)  | C6'               | HPI (3.2 Å)                          | C52 (Cβ)  | C6'               | HPI (3.7 Å)                          |
| C52 (C)   | C5'               | HPI (3.8 Å)                          | C52 (C)   | C5'               | HPI (3.9 Å)                          |

**Table S3:** Summary of all the possible bonds of mCCL2/hCCL2-myricetin (MT) complexes as obtained from molecular docking. HPI and H-bond represent the hydrophobic interaction, and hydrogen bond respectively.

| mCCL2              | Myricetin<br>(MT) | Type of<br>Interaction &<br>Distance | hCCL2              | Myricetin<br>(MT) | Type of<br>Interaction &<br>Distance |
|--------------------|-------------------|--------------------------------------|--------------------|-------------------|--------------------------------------|
| C11 (O)            | O4H               | H-Bond (2.0 Å)                       | C11 (O)            | O4H               | H-Bond (1.9 Å)                       |
| C11 (O)            | O2                | H-Bond (3.4 Å)                       | C11 (O)            | O2                | H-Bond (2.6 Å)                       |
| C12 (C $\beta$ )   | C7                | HPI (3.9 Å)                          | C12 (C $\alpha$ )  | C4                | HPI (3.9 Å)                          |
| Y13 (NH)           | O3H               | H-Bond (3.3 Å)                       | Y13 (HH)           | O2                | H-Bond (3.0 Å)                       |
| Y13 (NH)           | O3                | H-Bond (3.4 Å)                       | Y13 (HH)           | O3H               | H-Bond (3.2 Å)                       |
| Y13 (NH)           | C3                | HPI (3.8 Å)                          | N14 (O $\delta$ 1) | O3H               | H-Bond (1.7 Å)                       |
| S14 (O $\gamma$ )  | O8H               | H-Bond (1.8 Å)                       | N14 (O $\delta$ 1) | O3                | H-Bond (2.5 Å)                       |
| S14 (H $\gamma$ )  | O8                | H-Bond (3.1 Å)                       | N14 (C $\beta$ )   | C6'               | HPI (3.2 Å)                          |
| S14 (C)            | C5'               | HPI (3.9 Å)                          | F15 (NH)           | O8H               | H-Bond (3.3 Å)                       |
| F15 (N)            | O8H               | H-Bond (2.8 Å)                       | T16 (N)            | O7H               | H-Bond (3.3 Å)                       |
| F15 (NH)           | O8H               | H-Bond (3.2 Å)                       | T16 (N)            | O6                | H-Bond (2.7 Å)                       |
| T16 (N)            | O8                | H-Bond (3.1 Å)                       | T16 (N)            | O6H               | H-Bond (2.6 Å)                       |
| T16 (NH)           | O8                | H-Bond (2.9 Å)                       | T16 (NH)           | O6H               | H-Bond (2.0 Å)                       |
| T16 (NH)           | O6H               | H-Bond (3.4 Å)                       | T16 (NH)           | O7                | H-Bond (2.5 Å)                       |
| E50 (O $\eta$ 1)   | O5H               | H-Bond (1.7 Å)                       | E50 (O)            | O1                | H-Bond (3.8 Å)                       |
| E50 (O $\eta$ 1)   | O5                | H-Bond (2.6 Å)                       | E50 (O $\eta$ 1)   | O5                | H-Bond (2.7 Å)                       |
| E50 (C $\beta$ )   | C8                | HPI (3.8 Å)                          | E50 (O $\eta$ 1)   | O5H               | H-Bond (2.3 Å)                       |
| E50 (O)            | O1                | H-Bond (2.7 Å)                       | E50 (C $\beta$ )   | C8                | HPI (3.9 Å)                          |
| V51 (C $\gamma$ H) | O7H               | H-Bond (3.2 Å)                       | I51 (C $\gamma$ 2) | O7H               | HPI (3.9 Å)                          |
| C52 (NH)           | O1                | H-Bond (2.4 Å)                       | C52 (NH)           | O1                | H-Bond (3.3 Å)                       |
| C52 (N)            | O1                | H-Bond (3.3 Å)                       | C52 (C $\beta$ )   | C2'               | HPI (3.9 Å)                          |
| C52 (C $\beta$ )   | C6'               | HPI (3.7 Å)                          | C52 (O)            | O7H               | H-Bond (2.0 Å)                       |

**Figure S1:** Fluorescence quenching patterns of mCCL2-WT (A), mCCL2-P8A (B), hCCL2-WT (C) and hCCL2-P8A (D) upon addition of buffer (10  $\mu$ L and 20  $\mu$ L). A protein concentration of 25  $\mu$ M has been used for all the buffer titration experiments.

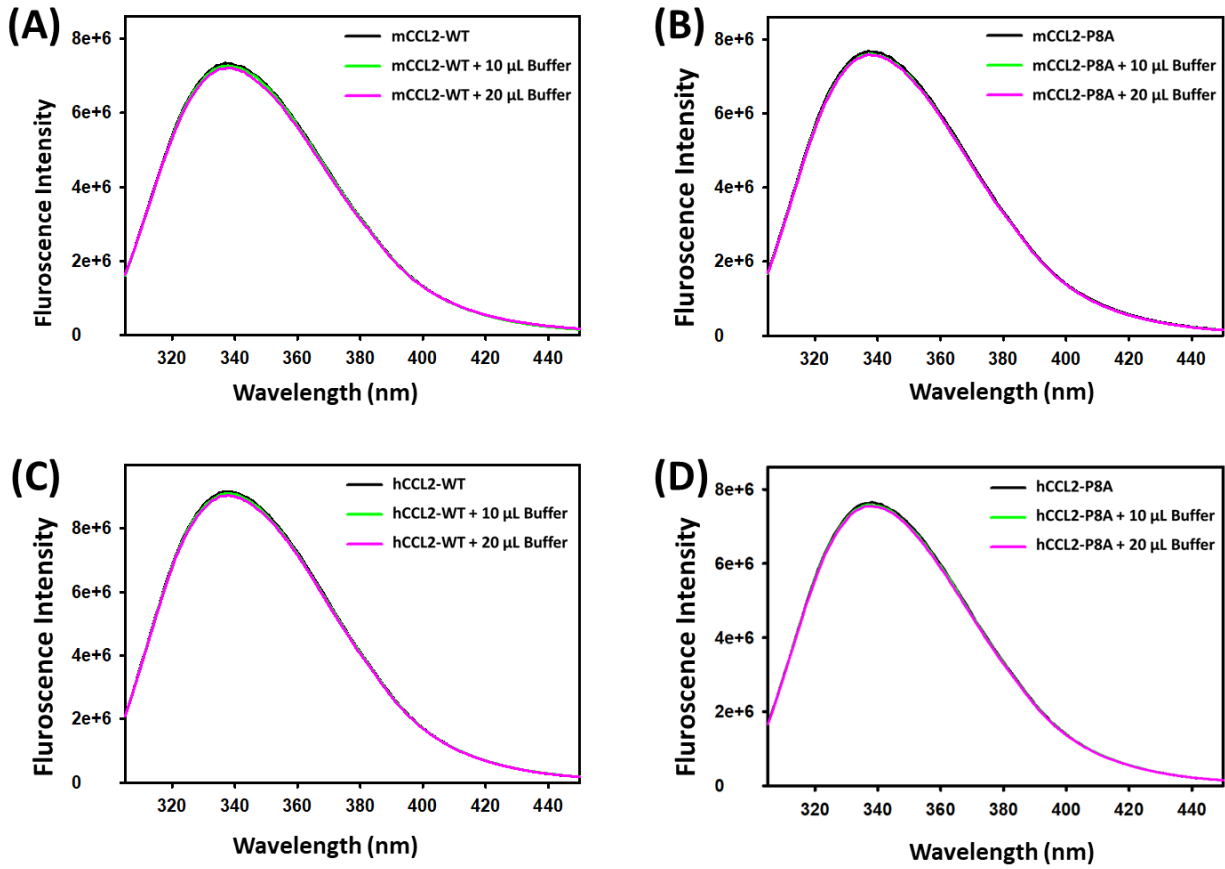

**Figure S2:** Fluorescence quenching pattern of CCL2 orthologs: Stern–Volmer plots of mCCL2-WT, mCCL2-P8A, hCCL2-WT and hCCL2-P8A complexed with kaempferol (KP) (A-D); quercetin (QT) (E-H); and myricetin (MT) (I-L) respectively.

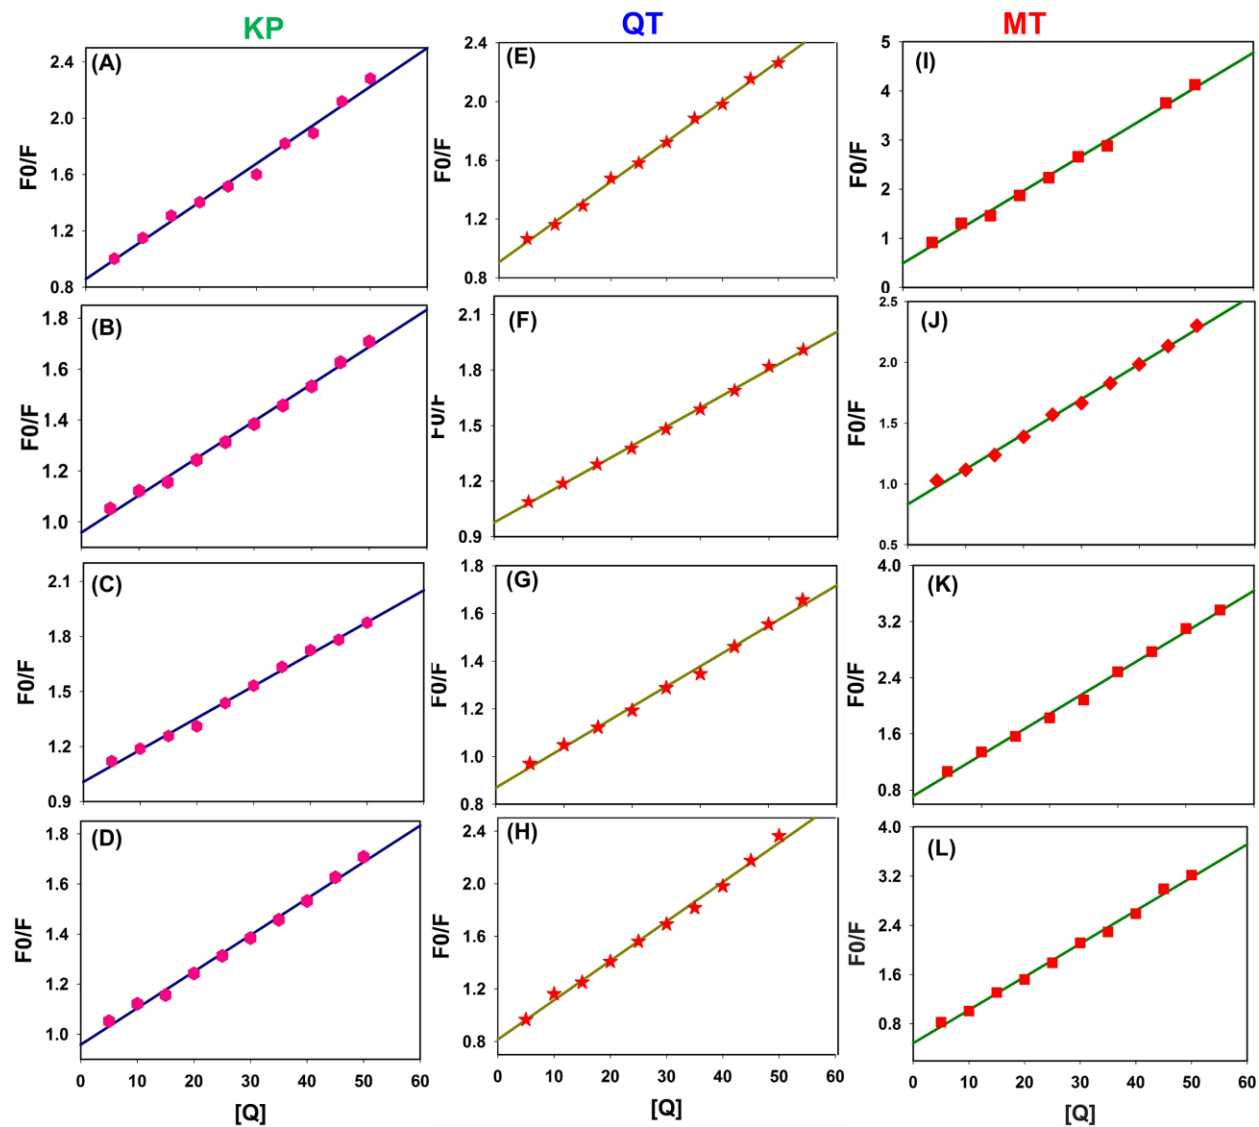

**Figure S3:** Double-log plots of mCCL2-WT, mCCL2-P8A, hCCL2-WT and hCCL2-P8A complexed with kaempferol (KP) (A-D); quercetin (QT) (E-H); and myricetin (MT) (I-L) respectively.

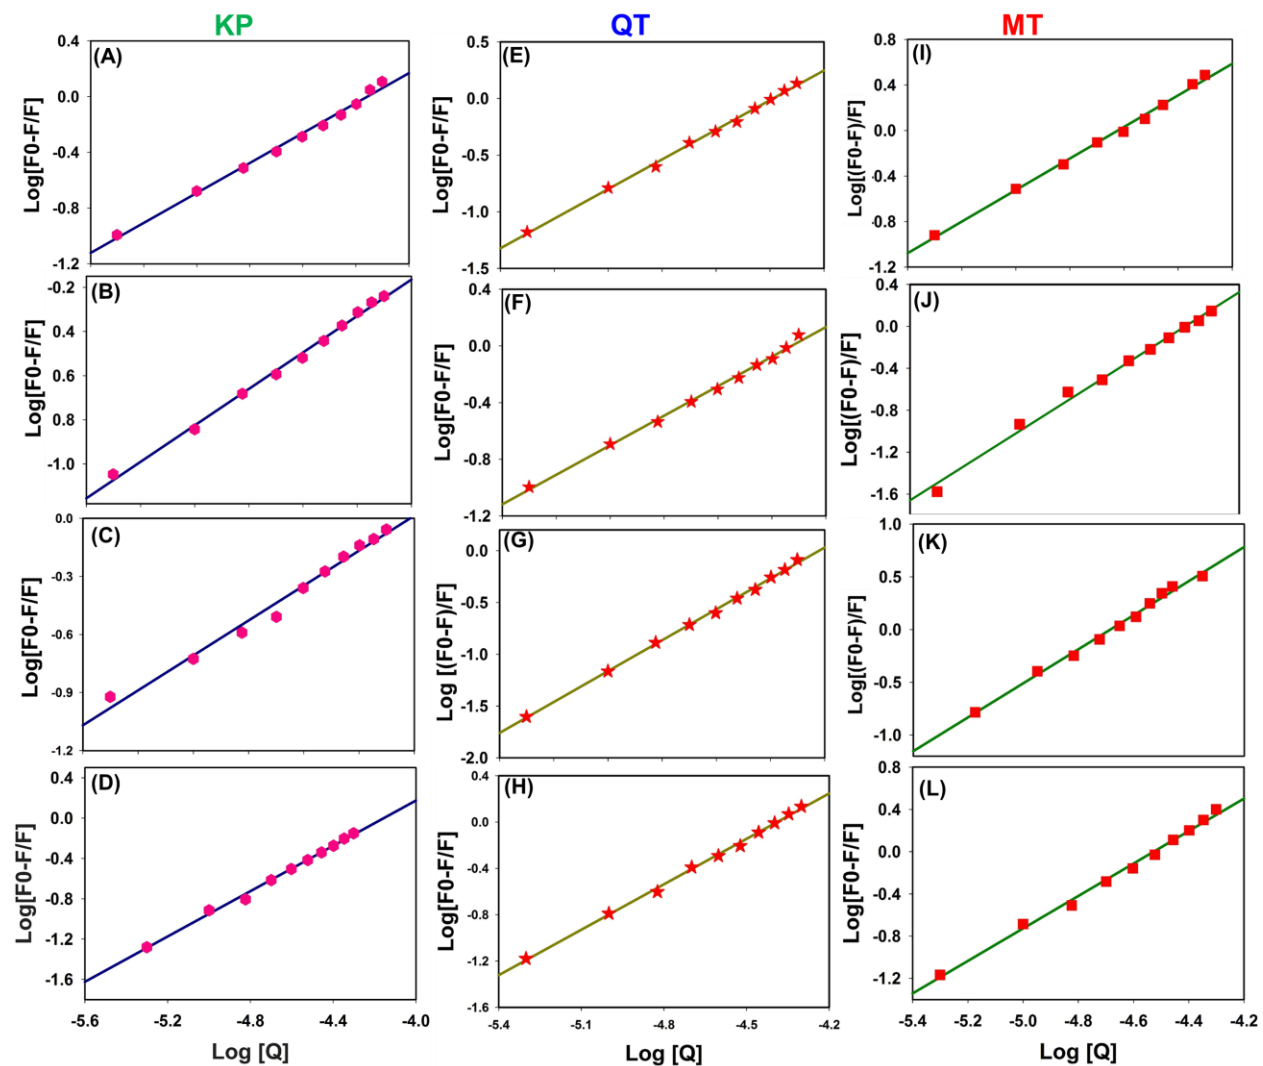

**Figure S4:** Representative plots showing the (A) Non-linear regression analysis, and (B) scatchard plot analysis of myricetin (MT) interaction with mCCL2-P8A. The obtained  $K_d$  value and number of binding sites ( $n$ ) are  $0.37 \pm 0.04 \mu\text{M}$  and  $1.2 \pm 0.2$  respectively.

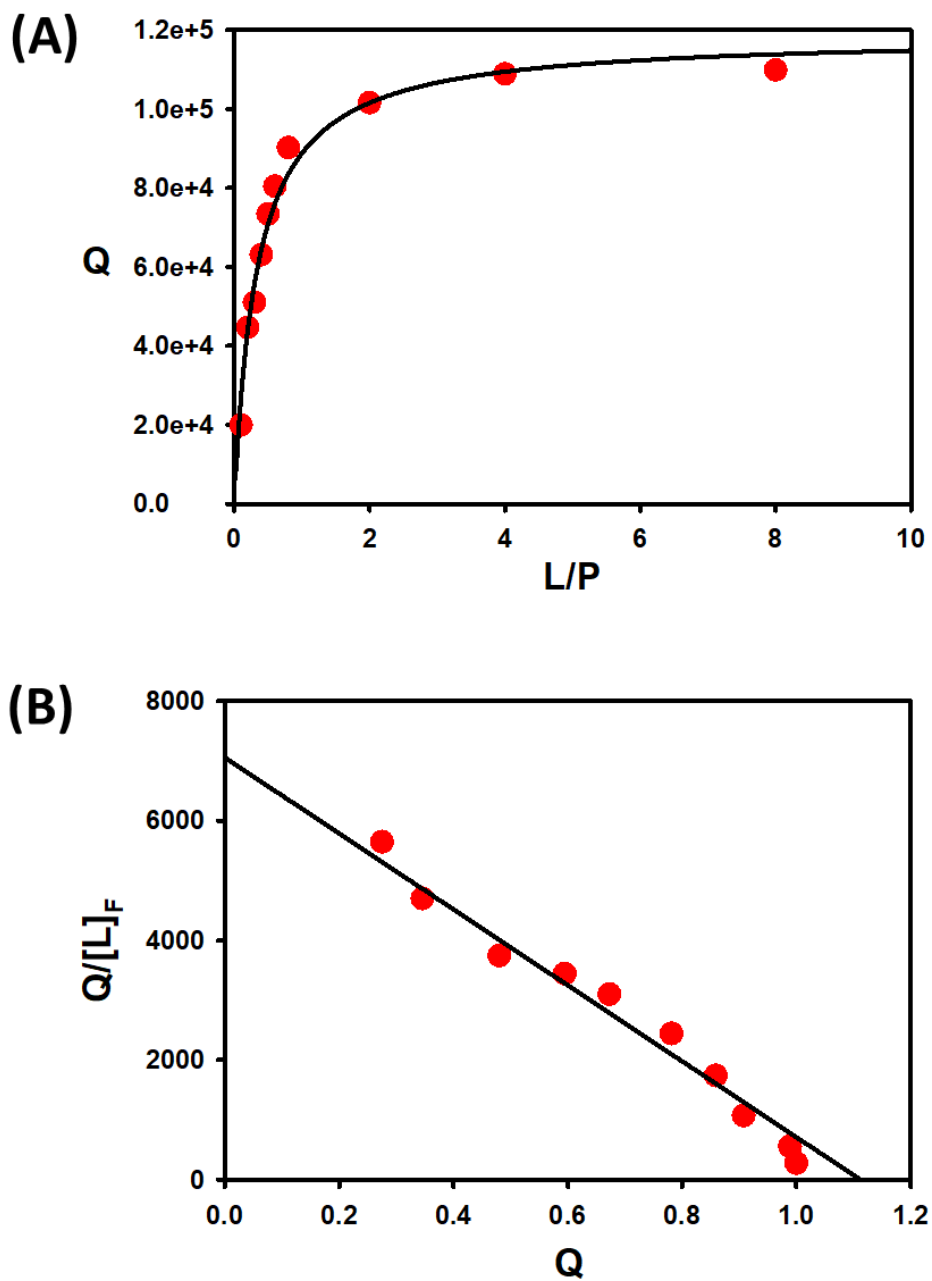



**Figure S5:** Coulomb- Short Range (Coul-SR) electrostatics of human and murine monomeric CCL2-flavonol (KP/QT/MT)-complex: hCCL2-Kaempferol (A); hCCL2-Myricetin (B); hCCL2-Quercetin (C); mCCL2-Kaempferol (D); mCCL2-Myricetin (E); and mCCL2-Quercetin (F) respectively. The red line represents the average Coul-SR interaction energy value.

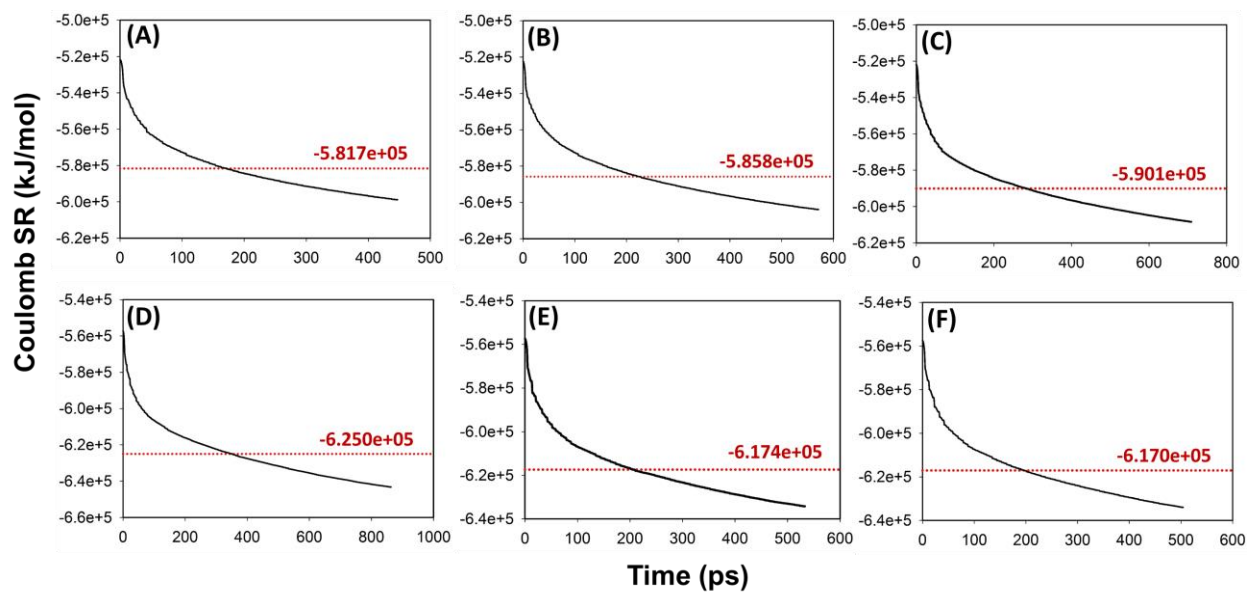

Supplement: ao1c00655_si_001.pdf [file ao1c00655_si_001.pdf]
